# Supplementary material for: Insecticidal Activity of Lemongrass Essential Oil as an Eco-Friendly Agent against the Black Cutworm Agrotis ipsilon (Lepidoptera: Noctuidae)
Source: MDPI journal article supplement (doi:10.3390/insects12080737), 2021-08-17
Supplement: s1 [file s1]

# Insecticidal Activity of Lemongrass Essential Oil as an Eco-friendly Agent Against the Black Cutworm *Agrotis ipsilon* (Lepidoptera: Noctuidae)

Moataz A. M. Moustafa <sup>1</sup>, Mona Awad <sup>1</sup>, Alia Amer <sup>2</sup>, Nancy N. Hassan <sup>1</sup>, El-Desoky S. Ibrahim <sup>1</sup>, Hayssam M. Ali <sup>3,4</sup>, Mohammad Akrami <sup>5</sup> and Mohamed Z. M. Salem <sup>6,\*</sup>

<sup>1</sup> Department of Economic Entomology and Pesticides, Faculty of Agriculture, Cairo University, 12613 Giza, Egypt; [moataz.moustafa79@gmail.com](mailto:moataz.moustafa79@gmail.com) (M.M.); [mona.awad2003@gmail.com](mailto:mona.awad2003@gmail.com) (M.A.); [whitehorse3050@gmail.com](mailto:whitehorse3050@gmail.com) (N.N.H.); [moat\\_mon@yahoo.com](mailto:moat_mon@yahoo.com) (E.D.S.I.)

<sup>2</sup> Medicinal and Aromatic plants Department, Horticulture Research Institute, Agricultural Research Center, Giza, Egypt (A.A.: [dr\\_aliaamer@yahoo.com](mailto:dr_aliaamer@yahoo.com))

<sup>3</sup> Botany and Microbiology Department, College of Science, King Saud University, P.O. Box 2455, Riyadh 11451, Saudi Arabia; [hayhassan@ksu.edu.sa](mailto:hayhassan@ksu.edu.sa)

<sup>4</sup> Timber Trees Research Department, Sabahia Horticulture Research Station, Horticulture Research Institute, Agriculture Research Center, Alexandria 21526, Egypt

<sup>5</sup> Department of Engineering, University of Exeter, Exeter EX4 4QF, UK; [m.akrami@exeter.ac.uk](mailto:m.akrami@exeter.ac.uk) (M.A.)

<sup>6</sup> Forestry and Wood Technology Department, Faculty of Agriculture (El-Shatby), Alexandria University, Alexandria 21545, Egypt; [zidan\\_forest@yahoo.com](mailto:zidan_forest@yahoo.com) (M.Z.M.S.)

\* Correspondence: [zidan\\_forest@yahoo.com](mailto:zidan_forest@yahoo.com); [mohamed-salem@alexu.edu.eg](mailto:mohamed-salem@alexu.edu.eg)

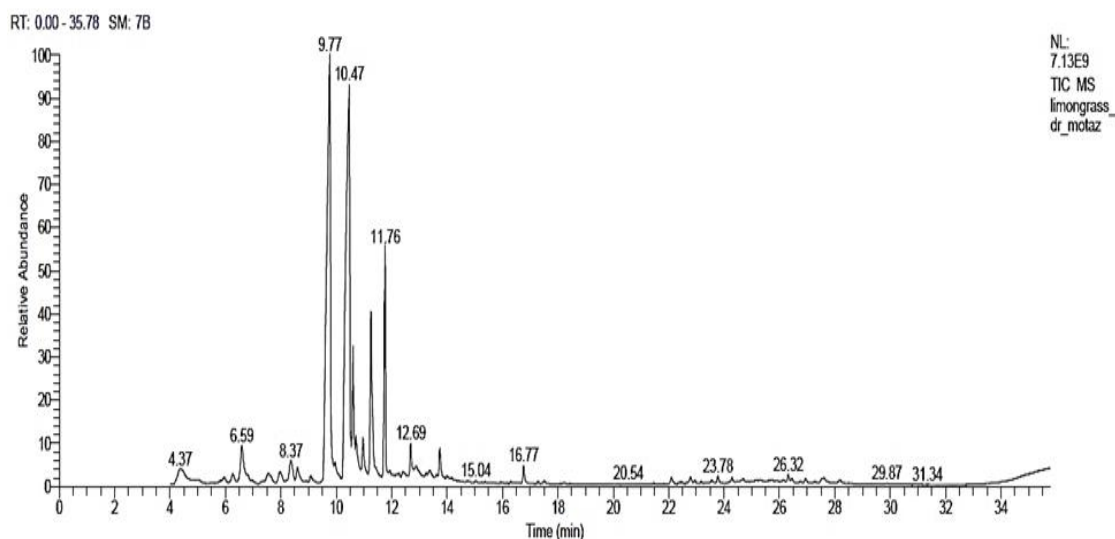

**Figure S1.** GC-MS chromatogram of the identified chemical compounds in the essential oil from *Cymbopogon citratus* leaves.
